# Supplementary material for: Risk Assessment of Postoperative Pneumonia in Cancer Patients Using a Common Data Model
Source: MDPI journal article supplement (doi:10.3390/cancers14235988), 2022-12-04
Supplement: s1 [file s1]

**Table S1.** Risk factors for postoperative pneumonia in lung cancer and gastric cancer.

| Variables                 | Lung cancer              |         |                          |         | Gastric cancer           |         |                          |         |
|---------------------------|--------------------------|---------|--------------------------|---------|--------------------------|---------|--------------------------|---------|
|                           | Univariate               |         | Multivariate             |         | Univariate               |         | Multivariate             |         |
|                           | Hazard ratio<br>(95% CI) | p-value |
| Age                       | 1.05<br>(1.03–1.07)      | <0.001  | 1.05<br>(1.03–1.07)      | <0.001  | 1.06<br>(1.04–1.07)      | <0.001  | 1.05<br>(1.03–1.07)      | <0.001  |
| Sex (Ref: Female)         | 1.66<br>(1.03–2.69)      | 0.038   |                          |         | 2.30<br>(1.50–3.50)      | <0.001  | 2.32<br>(1.51–3.56)      | <0.001  |
| Hypertension              | 2.58<br>(1.13–5.91)      | 0.025   |                          |         | 2.28<br>(1.33–3.91)      | 0.003   |                          |         |
| Renal disease             |                          |         |                          |         | 2.87<br>(1.26–6.51)      | 0.012   |                          |         |
| Chronic pulmonary disease | 2.12<br>(1.24–3.64)      | 0.006   |                          |         | 3.69<br>(1.93–7.04)      | <0.001  | 2.39<br>(1.24–4.61)      | 0.009   |
| Mood disorder             | 3.87<br>(1.22–12.25)     | 0.021   | 3.45<br>(1.09–10.94)     | 0.036   | 4.20<br>(1.34–13.21)     | 0.014   | 4.46<br>(1.37–14.51)     | 0.013   |
| Parkinson disease         |                          |         |                          |         | 4.09<br>(1.01–16.53)     | 0.048   |                          |         |
| Cerebrovascular disease   | 3.36<br>(1.69–6.69)      | 0.001   | 2.18<br>(1.07–4.43)      | 0.032   | 2.91<br>(1.67–5.08)      | <0.001  |                          |         |

CI: confidence interval
